# Supplementary material for: The Microbial Diversity of Traditional Spontaneously Fermented Lambic Beer
Source: PLoS One. 2014 Apr 18;9(4):e95384. doi: 10.1371/journal.pone.0095384 (PMC3991685; doi:10.1371/journal.pone.0095384)
Supplement: Table S1 — Occurrence of microbial taxa as identified through sequence analysis of V3 and LSU DGGE bands. (A) and (B) summarize the identifications from the V3 DGGE analyses from batches 1 and batch 2, respectively. (C) and (D) represent the LSU DGGE identifications for batches 1 and 2, respectively. +: taxon is present. (E) represents the identifications of the excised DNA bands. (XLSX) [file pone.0095384.s004.xlsx]

## Sheet: Table S1A
		Hanseniaspora	Pediococcus/Lactobacillus	Enterobacteriaceae	Acetic acid bacteria
Sampling moment	Sample
1 night	Batch 1 cask 2			+
1 night	Batch 1 cask 3			+
1 night	Batch 1 cask 4			+
1 week	Batch 1 cask 1			+
1 week	Batch 1 cask 2		+	+
1 week	Batch 1 cask 3			+
1 week	Batch 1 cask 4			+
2 weeks	Batch 1 cask 1			+
2 weeks	Batch 1 cask 2			+
2 weeks	Batch 1 cask 3			+
2 weeks	Batch 1 cask 4			+
3 weeks	Batch 1 cask 1			+
3 weeks	Batch 1 cask 2			+
3 weeks	Batch 1 cask 3			+
3 weeks	Batch 1 cask 4			+
1 month	Batch 1 cask 1			+
1 month	Batch 1 cask 2			+
1 month	Batch 1 cask 3			+
1 month	Batch 1 cask 4			+
2 months	Batch 1 cask 1		+	+	+
2 months	Batch 1 cask 2			+
2 months	Batch 1 cask 3	+		+
2 months	Batch 1 cask 4			+
3 months	Batch 1 cask 1	+	+	+
3 months	Batch 1 cask 2	+	+	+
3 months	Batch 1 cask 4	+	+	+
6 months	Batch 1 cask 1	+	+	+
6 months	Batch 1 cask 2	+	+	+
6 months	Batch 1 cask 3	+	+	+
6 months	Batch 1 cask 4	+	+	+
9 months	Batch 1 cask 1	+	+	+
9 months	Batch 1 cask 2	+	+	+
9 months	Batch 1 cask 3	+	+	+
9 months	Batch 1 cask 4	+	+	+
12 months	Batch 1 cask 1	+	+	+
12 months	Batch 1 cask 2	+	+	+
12 months	Batch 1 cask 3		+	+	+
18 months	Batch 1 cask 1		+	+
18 months	Batch 1 cask 2		+	+
18 months	Batch 1 cask 3		+	+	+
18 months	Batch 1 cask 4		+	+
24 months	Batch 1 cask 1		+
24 months	Batch 1 cask 2		+
24 months	Batch 1 cask 3		+		+
24 months	Batch 1 cask 4		+	+	+

## Sheet: Table S1B
		Hanseniaspora	Saccharomyces	Pediococcus/Lactobacillus	Enterobacteriaceae	Acetic acid bacteria
Sampling moment	Sample
1 night	Batch 2 cask 2				+
1 night	Batch 2 cask 3				+	+
1 night	Batch 2 cask 4				+	+
1 week	Batch 2 cask 1	+		+	+	+
1 week	Batch 2 cask 2	+	+	+	+	+
1 week	Batch 2 cask 3	+	+	+	+	+
1 week	Batch 2 cask 4	+	+	+	+	+
2 weeks	Batch 2 cask 1	+		+	+	+
2 weeks	Batch 2 cask 2	+	+	+	+	+
3 weeks	Batch 2 cask 1	+			+	+
3 weeks	Batch 2 cask 2	+	+	+	+	+
3 weeks	Batch 2 cask 3	+	+		+	+
3 weeks	Batch 2 cask 4	+			+	+
1 months	Batch 2 cask 1	+	+		+	+
1 months	Batch 2 cask 2	+	+	+	+	+
1 months	Batch 2 cask 3	+	+	+	+	+
1 months	Batch 2 cask 4	+	+		+	+
2 months	Batch 2 cask 1	+			+	+
2 months	Batch 2 cask 2	+	+		+	+
2 months	Batch 2 cask 3	+			+	+
2 months	Batch 2 cask 4	+			+	+
3 months	Batch 2 cask 1	+	+	+	+	+
3 months	Batch 2 cask 2	+	+	+	+	+
3 months	Batch 2 cask 3	+		+	+	+
3 months	Batch 2 cask 4	+		+	+	+
6 months	Batch 2 cask 1		+	+	+	+
6 months	Batch 2 cask 2		+	+	+	+
6 months	Batch 2 cask 3		+	+	+
6 months	Batch 2 cask 4		+	+	+
9 months	Batch 2 cask 1		+	+	+	+
9 months	Batch 2 cask 2		+	+	+	+
9 months	Batch 2 cask 3		+	+	+
9 months	Batch 2 cask 4		+	+	+
12 months	Batch 2 cask 1		+	+	+
12 months	Batch 2 cask 2		+	+		+
12 months	Batch 2 cask 3		+	+	+
12 months	Batch 2 cask 4		+	+	+
18 months	Batch 2 cask 1	+		+	+	+
18 months	Batch 2 cask 2	+		+	+	+
18 months	Batch 2 cask 3	+		+	+
18 months	Batch 2 cask 4			+	+	+
24 months	Batch 2 cask 1			+	+	+
24 months	Batch 2 cask 2			+	+	+
24 months	Batch 2 cask 3			+	+
24 months	Batch 2 cask 4		+	+	+

## Sheet: Table S1C
		Candida	Dekkera/Brettanomyces	Kregervanrija	Naumovia	Saccharomyces	Wickerhamomyces
Sampling moment	Sample
1 week	Batch 1 cask 2					+
1 week	Batch 1 cask 4	+				+	+
2 weeks	Batch 1 cask 1					+
2 weeks	Batch 1 cask 2	+				+
2 weeks	Batch 1 cask 3					+
2 weeks	Batch 1 cask 4					+
3 weeks	Batch 1 cask 1					+
3 weeks	Batch 1 cask 2					+
3 weeks	Batch 1 cask 3					+
3 weeks	Batch 1 cask 4					+
1 month	Batch 1 cask 1					+
1 month	Batch 1 cask 2					+
1 month	Batch 1 cask 3					+
1 month	Batch 1 cask 4					+
2 months	Batch 1 cask 1					+
2 months	Batch 1 cask 2					+
2 months	Batch 1 cask 3					+
2 months	Batch 1 cask 4					+
3 months	Batch 1 cask 1					+
3 months	Batch 1 cask 2	+		+		+
3 months	Batch 1 cask 3	+		+		+
3 months	Batch 1 cask 4	+				+
6 months	Batch 1 cask 1					+
6 months	Batch 1 cask 2	+		+		+
6 months	Batch 1 cask 3			+		+	+
6 months	Batch 1 cask 4					+
9 months	Batch 1 cask 1					+
9 months	Batch 1 cask 3					+
9 months	Batch 1 cask 4					+
12 months	Batch 1 cask 1		+		+	+	+
12 months	Batch 1 cask 2	+	+			+	+
12 months	Batch 1 cask 3	+	+		+	+	+
12 months	Batch 1 cask 4	+	+		+	+	+
18 months	Batch 1 cask 1	+			+	+
18 months	Batch 1 cask 2					+
18 months	Batch 1 cask 3				+	+
18 months	Batch 1 cask 4				+	+	+
24 months	Batch 1 cask 1		+		+	+	+
24 months	Batch 1 cask 2					+
24 months	Batch 1 cask 3					+
24 months	Batch 1 cask 4				+	+

## Sheet: Table S1D
		Candida	Dekkera/Brettanomyces	Kregervanrija	Naumovia	Saccharomyces	Wickerhamomyces
Sampling moment	Sample
1 night	Batch 2 cask 4					+
1 week	Batch 2 cask 1					+
1 week	Batch 2 cask 4					+
2 weeks	Batch 2 cask 1					+
2 weeks	Batch 2 cask 2				+	+
2 weeks	Batch 2 cask 3				+	+
2 weeks	Batch 2 cask 4					+
3 weeks	Batch 2 cask 1					+
3 weeks	Batch 2 cask 2					+
3 weeks	Batch 2 cask 3					+
3 weeks	Batch 2 cask 4					+
1 month	Batch 2 cask 1					+
1 month	Batch 2 cask 2					+
1 month	Batch 2 cask 3				+	+
1 month	Batch 2 cask 4				+	+
2 months	Batch 2 cask 1					+
2 months	Batch 2 cask 2					+
2 months	Batch 2 cask 3					+
2 months	Batch 2 cask 4				+	+	+
3 months	Batch 2 cask 1					+
3 months	Batch 2 cask 2			+		+	+
3 months	Batch 2 cask 3					+
3 months	Batch 2 cask 4		+	+		+	+
6 months	Batch 2 cask 1			+		+
6 months	Batch 2 cask 2			+		+
6 months	Batch 2 cask 3					+
6 months	Batch 2 cask 4	+			+	+	+
9 months	Batch 2 cask 1					+	+
9 months	Batch 2 cask 2					+	+
9 months	Batch 2 cask 3				+	+	+
9 months	Batch 2 cask 4	+		+	+	+	+
12 months	Batch 2 cask 1	+				+
12 months	Batch 2 cask 2	+		+		+	+
12 months	Batch 2 cask 3	+			+	+	+
12 months	Batch 2 cask 4		+	+	+	+	+
18 months	Batch 2 cask 1					+
18 months	Batch 2 cask 2					+	+
18 months	Batch 2 cask 3		+		+	+	+
18 months	Batch 2 cask 4	+	+		+	+
24 months	Batch 2 cask 1					+
24 months	Batch 2 cask 2				+	+	+
24 months	Batch 2 cask 3		+		+	+	+
24 months	Batch 2 cask 4				+	+

## Sheet: Table S1E
Band number	Accession number highest hit*	Similarity	Identification
1	AB004754	1	Enterobacteriaceae
2	AB681728	1	Enterobacteriaceae
3	AY696662	1	Enterobacteriaceae
4	AY696662	1	Enterobacteriaceae
5	AB681728	1	Enterobacteriaceae
6	AB681728	1	Enterobacteriaceae
7	AJ853891	1	Enterobacteriaceae
8	HE978272	1	Enterobacteriaceae
9	AJ853891	1	Enterobacteriaceae
10	AB681728	1	Enterobacteriaceae
11	AY046257	1	Hanseniaspora
12	AB681216	1	Pediococcus/Lactobacillus
13	AB681216	1	Pediococcus/Lactobacillus
14	AJ853891	1	Enterobacteriaceae
15	HE978272	1	Enterobacteriaceae
16	AJ318414	1	Pediococcus/Lactobacillus
17	AJ271383	1	Pediococcus/Lactobacillus
18	AJ271383	1	Pediococcus/Lactobacillus
19	AB681216	1	Pediococcus/Lactobacillus
20	AB681216	1	Pediococcus/Lactobacillus
21	AB681216	1	Pediococcus/Lactobacillus
22	AJ853891	1	Enterobacteriaceae
23	AJ853891	1	Enterobacteriaceae
24	U78183	1	Enterobacteriaceae
25	AF025367	1	Enterobacteriaceae
26	AJ853891	1	Enterobacteriaceae
27	HE978272	1	Enterobacteriaceae
28	AJ318414	1	Pediococcus/Lactobacillus
29	HE978272	1	Enterobacteriaceae
30	AY497740	1	Saccharomyces
31	AJ318414	1	Pediococcus/Lactobacillus
32	AJ318414	1	Pediococcus/Lactobacillus
33	AB681216	1	Pediococcus/Lactobacillus
34	AJ318414	1	Pediococcus/Lactobacillus
35	AB680026	1	Acetic acid bacteria
36	AB680026	1	Acetic acid bacteria
37	AJ279065	1	Saccharomyces
38	AJ279065	1	Saccharomyces
39	AJ279065	1	Saccharomyces
40	BR000309	1	Saccharomyces
41	AJ279065	1	Saccharomyces
42	AJ279065	1	Saccharomyces
43	AJ279065	1	Saccharomyces
44	BR000309	1	Saccharomyces
45	EU057562	1	Wickerhamomyces
46	DQ406717	1	Dekkera/Brettanomyces
47	AY007880	1	Naumovia
48	AJ279065	1	Saccharomyces
49	AY969049	1	Dekkera/Brettanomyces
50	EU057562	1	Wickerhamomyces
51	DQ406717	1	Dekkera/Brettanomyces
52	AY007880	1	Naumovia
53	AJ279065	1	Saccharomyces
54	AJ279065	1	Saccharomyces
55	BR000309	1	Saccharomyces
56	AJ279065	1	Saccharomyces
57	U70247	1	Kregervanrija
58	AY969049	1	Dekkera/Brettanomyces
59	AB365475	1	Candida
60	AJ279065	1	Saccharomyces
61	EU057562	1	Wickerhamomyces
62	AY007880	1	Naumovia
63	AJ279065	1	Saccharomyces
64	AY969049	1	Dekkera/Brettanomyces
*Highest hit with first type strain in BLAST results
